# Supplementary material for: 3D global aromaticity in a fully conjugated diradicaloid cage at different oxidation states
Source: Springer Nature journal article supplement (doi:10.1038/s41557-019-0399-2), 2020-01-20
Supplement: 41557_2019_399_MOESM22_ESM.mol [file 41557_2019_399_MOESM22_ESM.mol]

nchem.19050852C-compc-T12.mol
  ChemDraw11251911142D

122141  0  0  0  0  0  0  0  0999 V2000
   -1.1735   -0.0129    0.0000 C   0  0  0  0  0  0  0  0  0  0  0  0
   -1.9650   -0.1612    0.0000 S   0  0  0  0  0  0  0  0  0  0  0  0
   -2.3507    0.5457    0.0000 C   0  0  0  0  0  0  0  0  0  0  0  0
   -1.7975    1.1311    0.0000 C   0  0  0  0  0  0  0  0  0  0  0  0
   -1.0699    0.7858    0.0000 C   0  0  0  0  0  0  0  0  0  0  0  0
   -3.1556    0.8529    0.0000 C   0  0  0  0  0  0  0  0  0  0  0  0
   -4.4699   -0.4786    0.0000 C   0  0  0  0  0  0  0  0  0  0  0  0
   -4.4699   -0.0413    0.0000 C   0  0  0  0  0  0  0  0  0  0  0  0
   -3.8183    0.2157    0.0000 S   0  0  0  0  0  0  0  0  0  0  0  0
   -4.0672    0.6316    0.0000 C   0  0  0  0  0  0  0  0  0  0  0  0
   -4.8725    0.6316    0.0000 C   0  0  0  0  0  0  0  0  0  0  0  0
   -5.1214    0.2157    0.0000 C   0  0  0  0  0  0  0  0  0  0  0  0
   -5.1214   -0.7356    0.0000 C   0  0  0  0  0  0  0  0  0  0  0  0
   -4.8725   -1.1515    0.0000 C   0  0  0  0  0  0  0  0  0  0  0  0
   -3.8183   -0.7356    0.0000 S   0  0  0  0  0  0  0  0  0  0  0  0
   -4.0672   -1.1515    0.0000 C   0  0  0  0  0  0  0  0  0  0  0  0
    0.5071    0.9580    0.0000 S   0  0  0  0  0  0  0  0  0  0  0  0
    1.3122    0.9385    0.0000 C   0  0  0  0  0  0  0  0  0  0  0  0
    1.5425    0.1668    0.0000 C   0  0  0  0  0  0  0  0  0  0  0  0
    0.8797   -0.2906    0.0000 C   0  0  0  0  0  0  0  0  0  0  0  0
    1.9807    1.4820    0.0000 C   0  0  0  0  0  0  0  0  0  0  0  0
    1.4847    3.2860    0.0000 C   0  0  0  0  0  0  0  0  0  0  0  0
    1.8633    3.0673    0.0000 C   0  0  0  0  0  0  0  0  0  0  0  0
    1.7602    2.3745    0.0000 S   0  0  0  0  0  0  0  0  0  0  0  0
    2.2448    2.3822    0.0000 C   0  0  0  0  0  0  0  0  0  0  0  0
    2.6475    3.0796    0.0000 C   0  0  0  0  0  0  0  0  0  0  0  0
    2.4117    3.5030    0.0000 C   0  0  0  0  0  0  0  0  0  0  0  0
    1.5878    3.9787    0.0000 C   0  0  0  0  0  0  0  0  0  0  0  0
    1.1033    3.9711    0.0000 C   0  0  0  0  0  0  0  0  0  0  0  0
    0.9363    2.8503    0.0000 S   0  0  0  0  0  0  0  0  0  0  0  0
    0.7006    3.2737    0.0000 C   0  0  0  0  0  0  0  0  0  0  0  0
    0.2404   -1.7426    0.0000 S   0  0  0  0  0  0  0  0  0  0  0  0
   -0.1791   -2.4301    0.0000 C   0  0  0  0  0  0  0  0  0  0  0  0
   -0.9626   -2.2436    0.0000 C   0  0  0  0  0  0  0  0  0  0  0  0
   -1.0274   -1.4408    0.0000 C   0  0  0  0  0  0  0  0  0  0  0  0
   -0.0427   -3.2807    0.0000 C   0  0  0  0  0  0  0  0  0  0  0  0
    1.7677   -3.7531    0.0000 C   0  0  0  0  0  0  0  0  0  0  0  0
    1.3889   -3.9717    0.0000 C   0  0  0  0  0  0  0  0  0  0  0  0
    0.8405   -3.5360    0.0000 S   0  0  0  0  0  0  0  0  0  0  0  0
    0.6048   -3.9595    0.0000 C   0  0  0  0  0  0  0  0  0  0  0  0
    1.0075   -4.6569    0.0000 C   0  0  0  0  0  0  0  0  0  0  0  0
    1.4920   -4.6646    0.0000 C   0  0  0  0  0  0  0  0  0  0  0  0
    2.3160   -4.1888    0.0000 C   0  0  0  0  0  0  0  0  0  0  0  0
    2.5517   -3.7654    0.0000 C   0  0  0  0  0  0  0  0  0  0  0  0
    1.6644   -3.0604    0.0000 S   0  0  0  0  0  0  0  0  0  0  0  0
    2.1490   -3.0680    0.0000 C   0  0  0  0  0  0  0  0  0  0  0  0
   -2.0077   -1.9243    0.0000 C   0  0  0  0  0  0  0  0  0  0  0  0
   -1.3335   -1.6877    0.0000 C   0  0  0  0  0  0  0  0  0  0  0  0
   -1.3501   -0.9732    0.0000 C   0  0  0  0  0  0  0  0  0  0  0  0
   -2.0347   -0.7683    0.0000 S   0  0  0  0  0  0  0  0  0  0  0  0
   -2.4412   -1.3561    0.0000 C   0  0  0  0  0  0  0  0  0  0  0  0
   -3.2542   -1.4405    0.0000 C   0  0  0  0  0  0  0  0  0  0  0  0
    1.7886   -0.8979    0.0000 C   0  0  0  0  0  0  0  0  0  0  0  0
    1.2465   -0.4324    0.0000 C   0  0  0  0  0  0  0  0  0  0  0  0
    0.6360   -0.8041    0.0000 C   0  0  0  0  0  0  0  0  0  0  0  0
    0.8009   -1.4994    0.0000 S   0  0  0  0  0  0  0  0  0  0  0  0
    1.5133   -1.5575    0.0000 C   0  0  0  0  0  0  0  0  0  0  0  0
    2.0649   -2.1922    0.0000 C   0  0  0  0  0  0  0  0  0  0  0  0
   -0.1388   -0.3213    0.0000 C   0  0  0  0  0  0  0  0  0  0  0  0
   -0.9984    1.8766    0.0000 C   0  0  0  0  0  0  0  0  0  0  0  0
   -1.1306    1.1743    0.0000 C   0  0  0  0  0  0  0  0  0  0  0  0
   -0.5036    0.8315    0.0000 C   0  0  0  0  0  0  0  0  0  0  0  0
    0.0163    1.3220    0.0000 S   0  0  0  0  0  0  0  0  0  0  0  0
   -0.2896    1.9678    0.0000 C   0  0  0  0  0  0  0  0  0  0  0  0
   -0.0165    2.6933    0.0000 C   0  0  0  0  0  0  0  0  0  0  0  0
   -0.2839   -1.1312    0.0000 C   0  0  0  0  0  0  0  0  0  0  0  0
    0.2399    0.1983    0.0000 C   0  0  0  0  0  0  0  0  0  0  0  0
   -0.4058   -0.3152    0.0000 C   0  0  0  0  0  0  0  0  0  0  0  0
   -3.4623   -2.0260    0.0000 C   0  0  0  0  0  0  0  0  0  0  0  0
   -4.2866   -2.1778    0.0000 C   0  0  0  0  0  0  0  0  0  0  0  0
   -4.5672   -2.9675    0.0000 C   0  0  0  0  0  0  0  0  0  0  0  0
   -4.0236   -3.6054    0.0000 C   0  0  0  0  0  0  0  0  0  0  0  0
   -3.1993   -3.4536    0.0000 C   0  0  0  0  0  0  0  0  0  0  0  0
   -2.9187   -2.6640    0.0000 C   0  0  0  0  0  0  0  0  0  0  0  0
   -2.0945   -2.5121    0.0000 C   0  0  0  0  0  0  0  0  0  0  0  0
   -4.8301   -1.5398    0.0000 C   0  0  0  0  0  0  0  0  0  0  0  0
   -4.3043   -4.3952    0.0000 C   0  0  0  0  0  0  0  0  0  0  0  0
   -3.1819    1.6041    0.0000 C   0  0  0  0  0  0  0  0  0  0  0  0
   -2.4712    2.0483    0.0000 C   0  0  0  0  0  0  0  0  0  0  0  0
   -2.5004    2.8859    0.0000 C   0  0  0  0  0  0  0  0  0  0  0  0
   -3.2405    3.2793    0.0000 C   0  0  0  0  0  0  0  0  0  0  0  0
   -3.9512    2.8351    0.0000 C   0  0  0  0  0  0  0  0  0  0  0  0
   -3.9219    1.9975    0.0000 C   0  0  0  0  0  0  0  0  0  0  0  0
   -4.6327    1.5534    0.0000 C   0  0  0  0  0  0  0  0  0  0  0  0
   -1.7311    1.6549    0.0000 C   0  0  0  0  0  0  0  0  0  0  0  0
   -3.2697    4.1169    0.0000 C   0  0  0  0  0  0  0  0  0  0  0  0
   -0.5407    3.1888    0.0000 C   0  0  0  0  0  0  0  0  0  0  0  0
   -0.3466    4.0041    0.0000 C   0  0  0  0  0  0  0  0  0  0  0  0
   -0.9558    4.5798    0.0000 C   0  0  0  0  0  0  0  0  0  0  0  0
   -1.7588    4.3402    0.0000 C   0  0  0  0  0  0  0  0  0  0  0  0
   -1.9528    3.5248    0.0000 C   0  0  0  0  0  0  0  0  0  0  0  0
   -1.3438    2.9491    0.0000 C   0  0  0  0  0  0  0  0  0  0  0  0
   -1.5379    2.1338    0.0000 C   0  0  0  0  0  0  0  0  0  0  0  0
    0.4564    4.2437    0.0000 C   0  0  0  0  0  0  0  0  0  0  0  0
   -2.3679    4.9159    0.0000 C   0  0  0  0  0  0  0  0  0  0  0  0
    2.7300    1.0523    0.0000 C   0  0  0  0  0  0  0  0  0  0  0  0
    2.7323    0.2142    0.0000 C   0  0  0  0  0  0  0  0  0  0  0  0
    3.4594   -0.2028    0.0000 C   0  0  0  0  0  0  0  0  0  0  0  0
    4.1841    0.2184    0.0000 C   0  0  0  0  0  0  0  0  0  0  0  0
    4.1816    1.0564    0.0000 C   0  0  0  0  0  0  0  0  0  0  0  0
    3.4545    1.4734    0.0000 C   0  0  0  0  0  0  0  0  0  0  0  0
    3.4522    2.3116    0.0000 C   0  0  0  0  0  0  0  0  0  0  0  0
    2.0078   -0.2069    0.0000 C   0  0  0  0  0  0  0  0  0  0  0  0
    4.9110   -0.1986    0.0000 C   0  0  0  0  0  0  0  0  0  0  0  0
    2.8342   -1.8409    0.0000 C   0  0  0  0  0  0  0  0  0  0  0  0
    3.5169   -2.3271    0.0000 C   0  0  0  0  0  0  0  0  0  0  0  0
    4.2793   -1.9790    0.0000 C   0  0  0  0  0  0  0  0  0  0  0  0
    4.3590   -1.1446    0.0000 C   0  0  0  0  0  0  0  0  0  0  0  0
    3.6763   -0.6584    0.0000 C   0  0  0  0  0  0  0  0  0  0  0  0
    2.9140   -1.0065    0.0000 C   0  0  0  0  0  0  0  0  0  0  0  0
    2.2313   -0.5203    0.0000 C   0  0  0  0  0  0  0  0  0  0  0  0
    3.4372   -3.1614    0.0000 C   0  0  0  0  0  0  0  0  0  0  0  0
    5.1214   -0.7966    0.0000 C   0  0  0  0  0  0  0  0  0  0  0  0
   -0.7390   -3.5872    0.0000 C   0  0  0  0  0  0  0  0  0  0  0  0
   -1.4149   -3.0918    0.0000 C   0  0  0  0  0  0  0  0  0  0  0  0
   -2.1820   -3.4295    0.0000 C   0  0  0  0  0  0  0  0  0  0  0  0
   -2.2732   -4.2627    0.0000 C   0  0  0  0  0  0  0  0  0  0  0  0
   -1.5972   -4.7581    0.0000 C   0  0  0  0  0  0  0  0  0  0  0  0
   -0.8301   -4.4204    0.0000 C   0  0  0  0  0  0  0  0  0  0  0  0
   -0.1541   -4.9159    0.0000 C   0  0  0  0  0  0  0  0  0  0  0  0
   -1.3239   -2.2586    0.0000 C   0  0  0  0  0  0  0  0  0  0  0  0
   -3.0402   -4.6004    0.0000 C   0  0  0  0  0  0  0  0  0  0  0  0
 74 75  1  0      
 73 74  2  0      
 72 73  1  0      
 72 77  1  0      
 71 72  2  0      
 70 71  1  0      
 70 76  1  0      
 69 70  2  0      
 69 74  1  0      
 52 69  1  0      
 83 84  1  0      
 82 83  2  0      
 81 82  1  0      
 81 86  1  0      
 80 81  2  0      
 79 80  1  0      
 79 85  1  0      
 78 79  2  0      
 78 83  1  0      
  6 78  1  0      
 92 93  1  0      
 91 92  2  0      
 90 91  1  0      
 90 95  1  0      
 89 90  2  0      
 88 89  1  0      
 88 94  1  0      
 87 88  2  0      
 87 92  1  0      
 65 87  1  0      
101102  1  0      
100101  2  0      
 99100  1  0      
 99104  1  0      
 98 99  2  0      
 97 98  1  0      
 97103  1  0      
 96 97  2  0      
 96101  1  0      
 21 96  1  0      
110111  1  0      
109110  2  0      
108109  1  0      
108113  1  0      
107108  2  0      
106107  1  0      
106112  1  0      
105106  2  0      
105110  1  0      
 58105  1  0      
119120  1  0      
118119  2  0      
117118  1  0      
117122  1  0      
116117  2  0      
115116  1  0      
115121  1  0      
114115  2  0      
114119  1  0      
 36114  1  0      
  1 68  1  0      
  1  2  1  0      
  2  3  1  0      
  3  4  2  0      
  4  5  1  0      
  5  1  2  0      
  3  6  1  0      
  7  8  2  0      
  8  9  1  0      
  9 10  1  0      
 10 11  1  0      
 11 12  2  0      
 12  8  1  0      
  7 13  1  0      
 13 14  2  0      
 14 16  1  0      
 16 15  1  0      
 15  7  1  0      
 10  6  2  0      
 16 52  2  0      
 67 17  1  0      
 17 18  1  0      
 18 19  2  0      
 19 20  1  0      
 20 67  2  0      
 18 21  1  0      
 22 23  2  0      
 23 24  1  0      
 24 25  1  0      
 25 26  1  0      
 26 27  2  0      
 27 23  1  0      
 22 28  1  0      
 28 29  2  0      
 29 31  1  0      
 31 30  1  0      
 30 22  1  0      
 25 21  2  0      
 31 65  2  0      
 66 32  1  0      
 32 33  1  0      
 33 34  1  0      
 34 35  2  0      
 35 66  1  0      
 33 36  2  0      
 37 38  1  0      
 38 39  1  0      
 39 40  1  0      
 40 41  2  0      
 41 42  1  0      
 42 38  2  0      
 37 43  2  0      
 43 44  1  0      
 44 46  2  0      
 46 45  1  0      
 45 37  1  0      
 40 36  1  0      
 46 58  1  0      
 47 48  1  0      
 48 49  2  0      
 49 50  1  0      
 50 51  1  0      
 51 47  2  0      
 51 52  1  0      
 53 54  2  0      
 54 55  1  0      
 55 56  1  0      
 56 57  1  0      
 57 53  1  0      
 57 58  2  0      
 55 59  2  0      
 60 61  1  0      
 61 62  2  0      
 62 63  1  0      
 63 64  1  0      
 64 60  2  0      
 64 65  1  0      
 59 49  1  0      
 59 62  1  0      
 66 68  2  0      
 67 68  1  0      
M  STY  1   1 SUP
M  SLB  1   1   1
M  SAL   1  9  69  70  71  72  73  74  75  76  77
M  SBL   1  1  10
M  SMT   1 Mes
M  SBV   1  10    0.2081    0.5855
M  STY  1   2 SUP
M  SLB  1   2   2
M  SAL   2  9  78  79  80  81  82  83  84  85  86
M  SBL   2  1  20
M  SMT   2 Mes
M  SBV   2  20    0.0263   -0.7511
M  STY  1   3 SUP
M  SLB  1   3   3
M  SAL   3  9  87  88  89  90  91  92  93  94  95
M  SBL   3  1  30
M  SMT   3 Mes
M  SBV   3  30    0.5242   -0.4954
M  STY  1   4 SUP
M  SLB  1   4   4
M  SAL   4  9  96  97  98  99 100 101 102 103 104
M  SBL   4  1  40
M  SMT   4 Mes
M  SBV   4  40   -0.7493    0.4297
M  STY  1   5 SUP
M  SLB  1   5   5
M  SAL   5  9 105 106 107 108 109 110 111 112 113
M  SBL   5  1  50
M  SMT   5 Mes
M  SBV   5  50   -0.7693   -0.3513
M  STY  1   6 SUP
M  SLB  1   6   6
M  SAL   6  9 114 115 116 117 118 119 120 121 122
M  SBL   6  1  60
M  SMT   6 Mes
M  SBV   6  60    0.6963    0.3065
M  END
